# Supplementary material
Source: PubMed Central journal article supplement (PMC1360538)

**non-IR**

**IR**

**1**

**2**

**3**

**4**

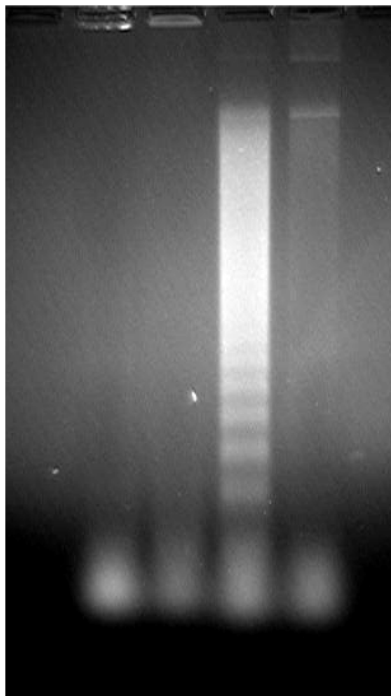

Supplement: pnas_0507779103_1.pdf [file pnas_0507779103_1.pdf]

## DNA histogram in irradiated HCT116

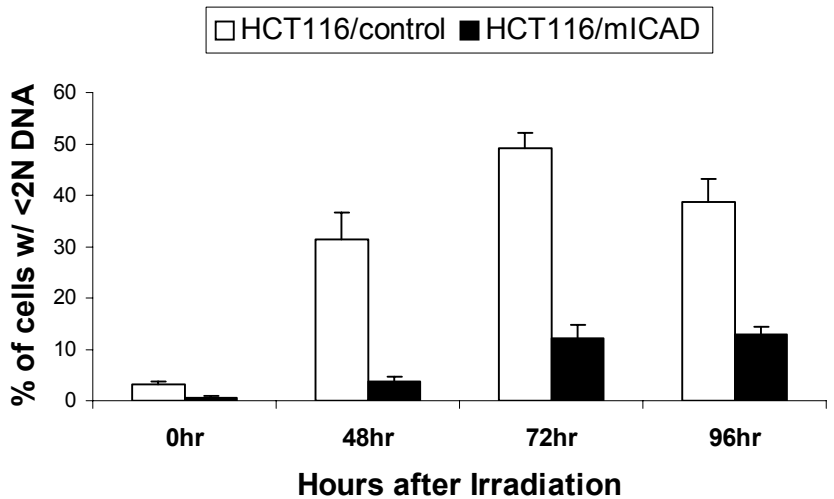

## DNA fragmentation in TNF $\alpha$ -treated HCT116 cells

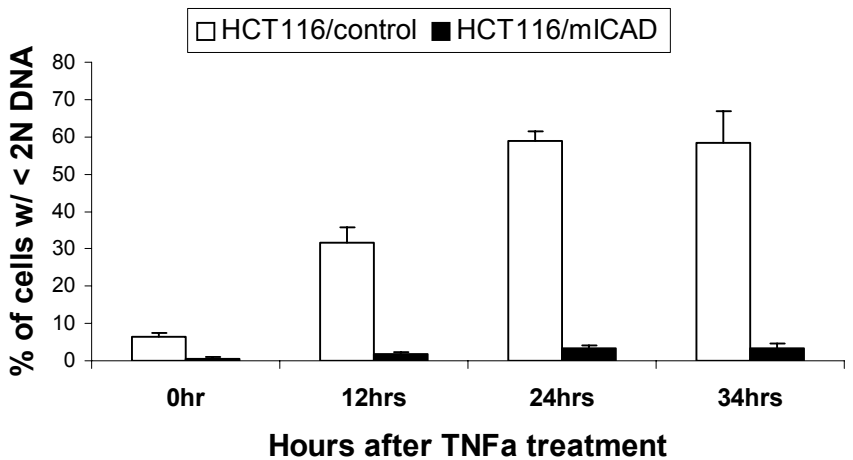

Supplement: pnas_0507779103_2.pdf [file pnas_0507779103_2.pdf]

## Cell death 24 hours after IR

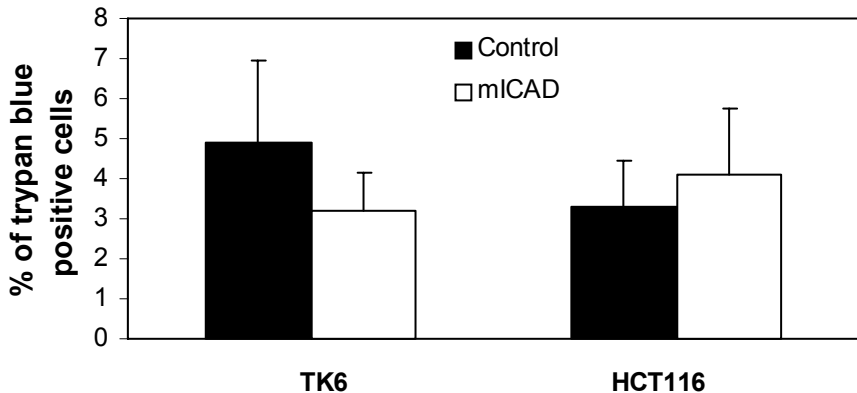

Supplement: pnas_0507779103_3.pdf [file pnas_0507779103_3.pdf]

**A.**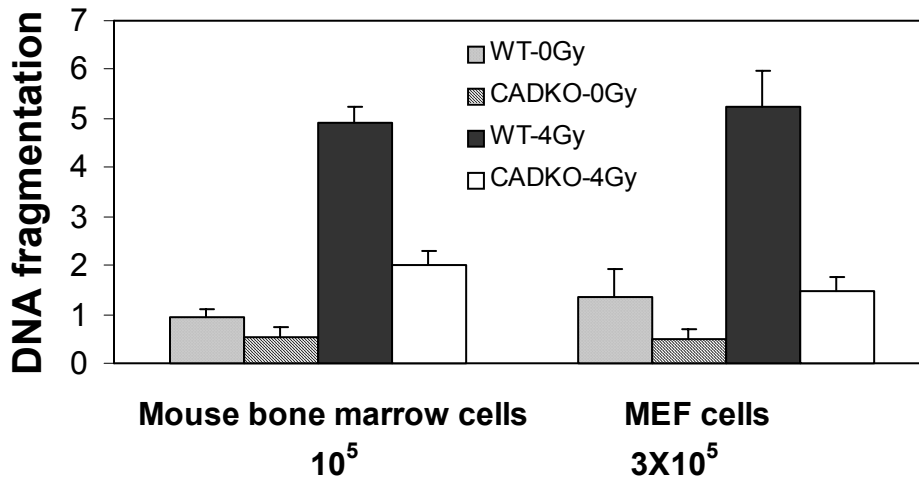**B.**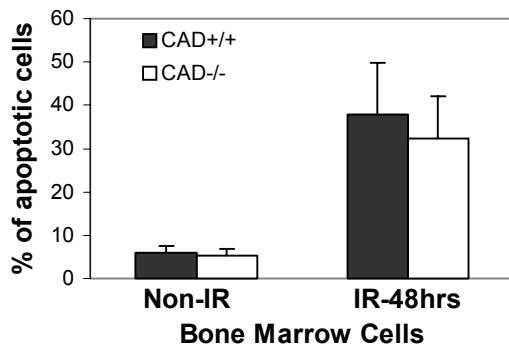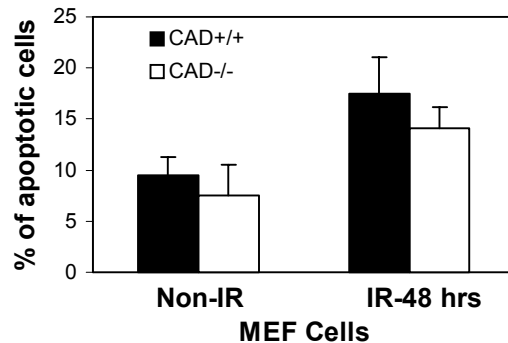

Supplement: pnas_0507779103_4.pdf [file pnas_0507779103_4.pdf]

**B**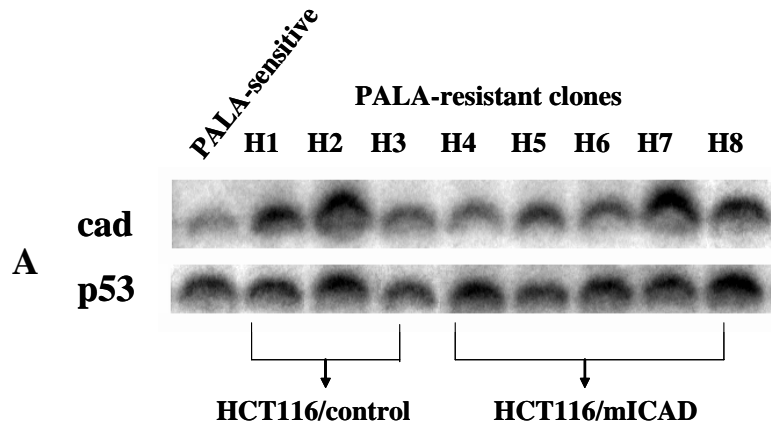

| Clone#                         | control | H1   | H2   | H3   | H4   | H5   | H6   | H7   | H8   |
|--------------------------------|---------|------|------|------|------|------|------|------|------|
| Relative <i>cad</i> gene copy# | 1.0     | 1.98 | 2.64 | 1.96 | 1.72 | 2.39 | 1.92 | 3.05 | 1.85 |

Supplement: pnas_0507779103_5.pdf [file pnas_0507779103_5.pdf]

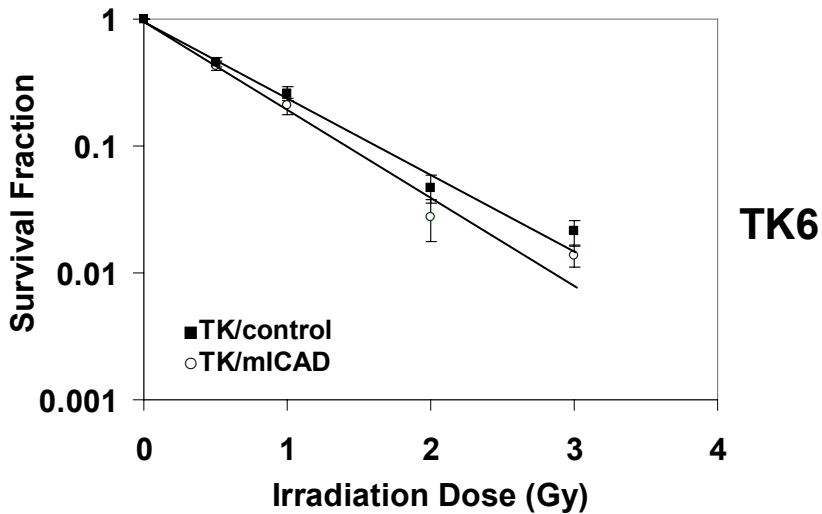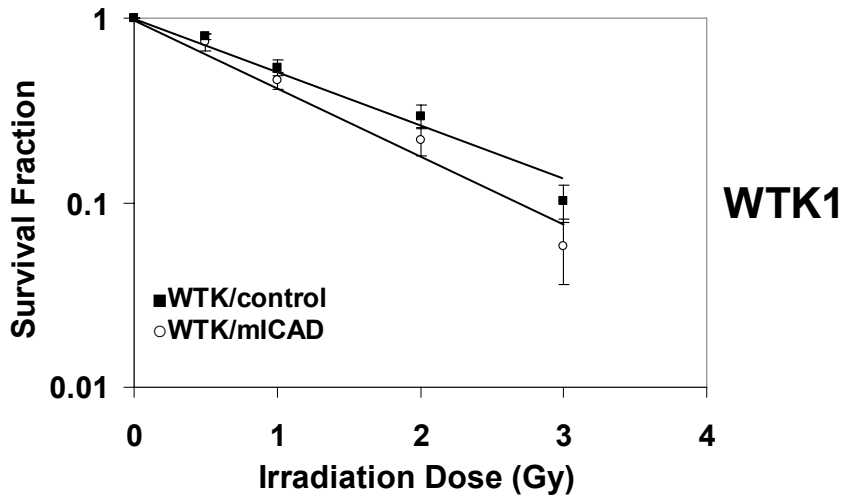

Supplement: pnas_0507779103_6.pdf [file pnas_0507779103_6.pdf]

**Survival fraction of Annexin  
V-positive cells**

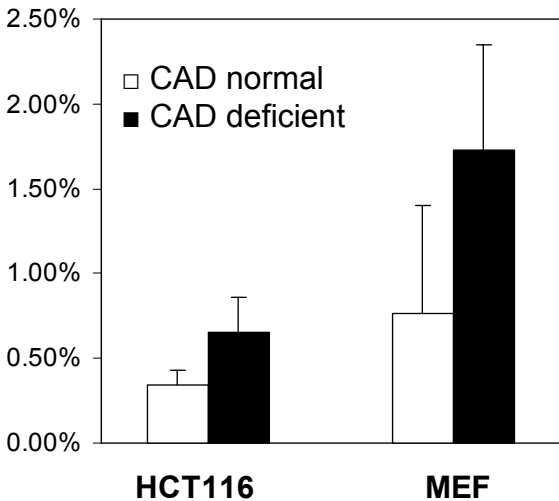

Supplement: pnas_0507779103_7.pdf [file pnas_0507779103_7.pdf]
